# Supplementary material for: Expansion of ruminant-specific microRNAs shapes target gene expression divergence between ruminant and non-ruminant species
Source: PubMed Central journal article supplement (PMC3847189; doi:10.1186/1471-2164-14-609), 2013-09-10
Supplement: 1471-2164-14-609-S5.pdf [file 1471-2164-14-609-S5.pdf]

## Additional file 5- Comparison of target mRNA expression between cattle and human

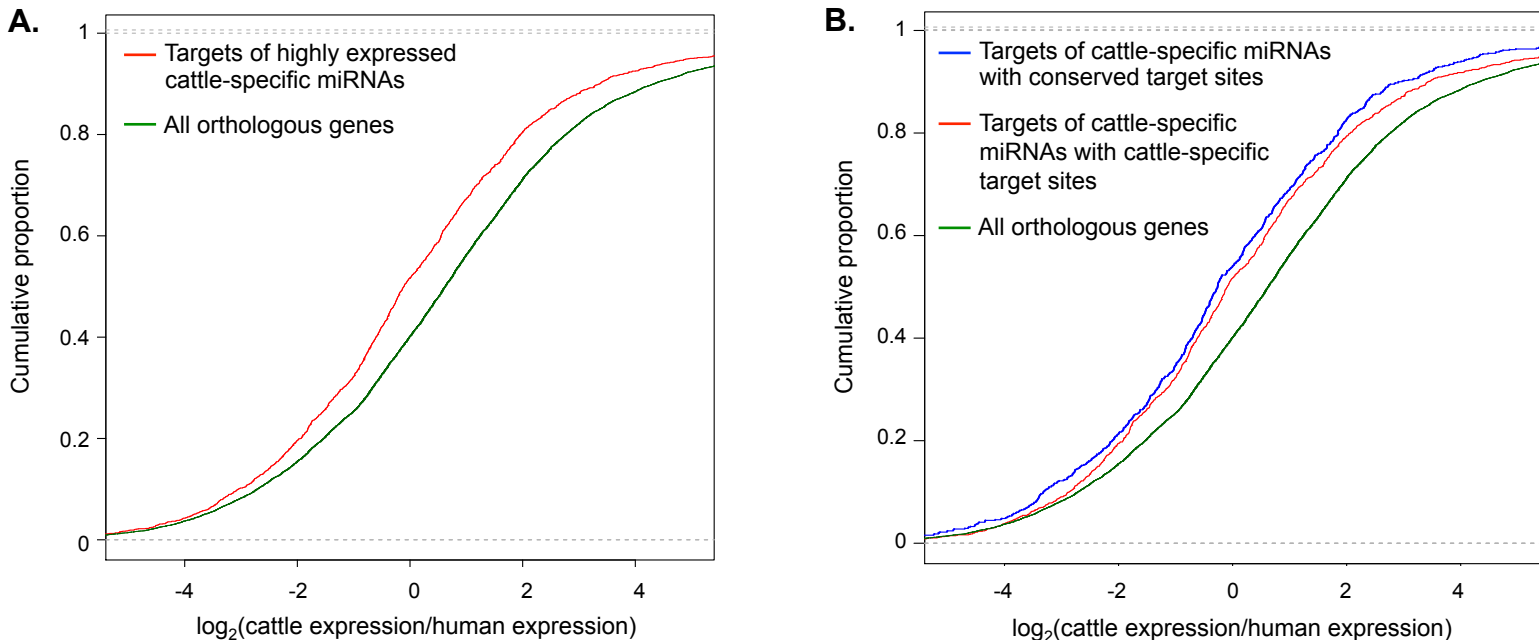

Cumulative distribution function (CDF) plots of log<sub>2</sub>-transformed gene expression (cpm) ratios. Each ratio is calculated as the expression of a bovine mRNA divided by the expression of its human orthologue. (A) The CDF for targets of highly expressed cattle-specific miRNAs ( $n = 1829$ ) and all orthologous genes ( $n = 9442$ ) is significantly different ( $p < 2.2e-16$ ) by the Kolmogorov-Smirnov test. Genes that are targeted by both conserved and cattle-specific miRNAs were excluded from this analysis. (B) The CDFs for targets of highly expressed cattle-specific miRNAs with conserved target sites ( $n = 830$ ) and all orthologous genes ( $n = 9442$ ) are significantly different ( $p = 8.554e-16$ ) by the Kolmogorov-Smirnov test, as are the CDFs for targets of highly expressed cattle-specific miRNAs with cattle-specific target sites ( $n = 1161$ ) and all orthologous genes ( $p = 2.821e-13$ ). However, the CDF for targets of highly expressed cattle-specific miRNAs with conserved target sites is not significantly different from the CDF for targets of highly expressed cattle-specific miRNAs with cattle-specific target sites ( $p = 0.25$ ).
